# Supplementary material for: Tissue Inhibitor of Matrix Metalloproteinases-1 (TIMP-1) and Pulmonary Involvement in COVID-19 Pneumonia
Source: MDPI journal article supplement (doi:10.3390/biom13071040), 2023-06-26

**Supplementary Figure 1. Gelatin zymography gels.** Two gelatin zymography gels are provided as examples. MMP-9: matrix metalloproteinase-9; MMP-2: matrix metalloproteinase-2.

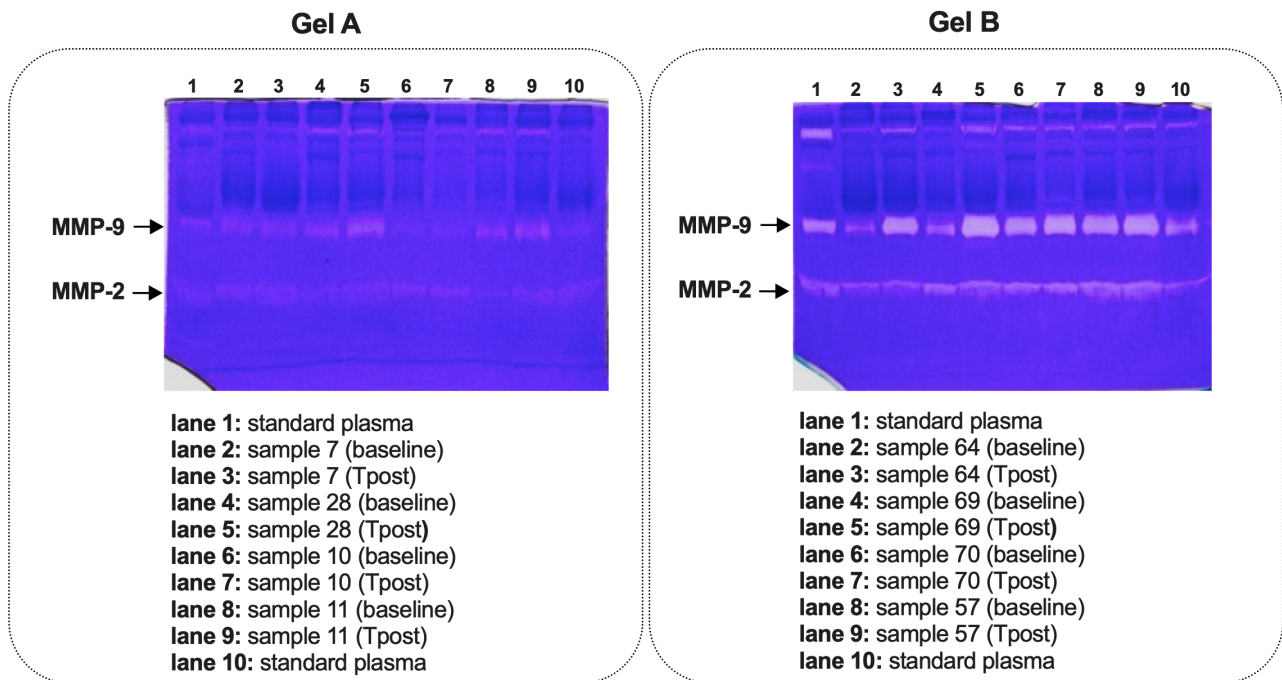

Supplement: s1 [file s1]
